# Supplementary material for: A Major Determinant of Cyclophilin Dependence and Cyclosporine Susceptibility of Hepatitis C Virus Identified by a Genetic Approach
Source: PubMed Central journal article supplement (PMC2944805; doi:10.1371/journal.ppat.1001118), 2010-09-23

S2

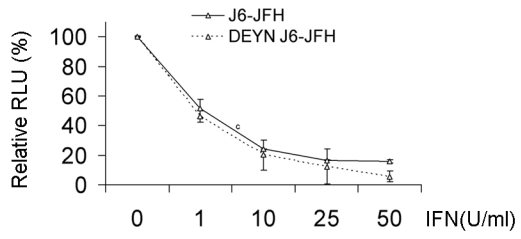

Supplement: ppat.1001118.s002.pdf [file ppat.1001118.s002.pdf]
